# Supplementary material
Source: publisher site journal article supplement (https://www.dovepress.com/get_supplementary_file.php?f=452670.xlsx)
Supplement: Supplementary file 1 [file get_supplementary_file.php]

## Sheet: Sheet1
Supplementary Table 1: inflammatory genes
ID	Gene ID	Symbol
ABCA1	19	ABCA1
ABI1	10006	ABI1
ACVR1B	91	ACVR1B
ACVR2A	92	ACVR2A
ADM	133	ADM
ADORA2B	136	ADORA2B
ADRM1	11047	ADRM1
AHR	196	AHR
APLNR	187	APLNR
AQP9	366	AQP9
ATP2A2	488	ATP2A2
ATP2B1	490	ATP2B1
ATP2C1	27032	ATP2C1
AXL	558	AXL
BDKRB1	623	BDKRB1
BEST1	7439	BEST1
BST2	684	BST2
BTG2	7832	BTG2
C3AR1	719	C3AR1
C5AR1	728	C5AR1
CALCRL	10203	CALCRL
CCL17	6361	CCL17
CCL2	6347	CCL2
CCL20	6364	CCL20
CCL22	6367	CCL22
CCL24	6369	CCL24
CCL5	6352	CCL5
CCL7	6354	CCL7
CCR7	1236	CCR7
CCRL2	9034	CCRL2
CD14	929	CD14
CD40	958	CD40
CD48	962	CD48
CD55	1604	CD55
CD69	969	CD69
CD70	970	CD70
CD82	3732	CD82
CDKN1A	1026	CDKN1A
CHST2	9435	CHST2
CLEC5A	23601	CLEC5A
CMKLR1	1240	CMKLR1
CSF1	1435	CSF1
CSF3	1440	CSF3
CSF3R	1441	CSF3R
CX3CL1	6376	CX3CL1
CXCL10	3627	CXCL10
CXCL11	6373	CXCL11
CXCL6	6372	CXCL6
CXCL9	4283	CXCL9
CXCR6	10663	CXCR6
CYBB	1536	CYBB
DCBLD2	131566	DCBLD2
EBI3	10148	EBI3
EDN1	1906	EDN1
EIF2AK2	5610	EIF2AK2
EMP3	2014	EMP3
EMR1	2015	ADGRE1
EREG	2069	EREG
F3	2152	F3
FFAR2	2867	FFAR2
FPR1	2357	FPR1
FZD5	7855	FZD5
GABBR1	2550	GABBR1
GCH1	2643	GCH1
GNA15	2769	GNA15
GNAI3	2773	GNAI3
GP1BA	2811	GP1BA
GPC3	2719	GPC3
GPR132	29933	GPR132
GPR183	1880	GPR183
HAS2	3037	HAS2
HBEGF	1839	HBEGF
HIF1A	3091	HIF1A
HPN	3249	HPN
HRH1	3269	HRH1
ICAM1	3383	ICAM1
ICAM4	3386	ICAM4
ICOSLG	23308	ICOSLG
IFITM1	8519	IFITM1
IFNAR1	3454	IFNAR1
IFNGR2	3460	IFNGR2
IL10	3586	IL10
IL10RA	3587	IL10RA
IL12B	3593	IL12B
IL15	3600	IL15
IL15RA	3601	IL15RA
IL18	3606	IL18
IL18R1	8809	IL18R1
IL18RAP	8807	IL18RAP
IL1A	3552	IL1A
IL1B	3553	IL1B
IL1R1	3554	IL1R1
IL2RB	3560	IL2RB
IL4R	3566	IL4R
IL6	3569	IL6
IL7R	3575	IL7R
IL8	3576	CXCL8
INHBA	3624	INHBA
IRAK2	3656	IRAK2
IRF1	3659	IRF1
IRF7	3665	IRF7
ITGA5	3678	ITGA5
ITGB3	3690	ITGB3
ITGB8	3696	ITGB8
KCNA3	3738	KCNA3
KCNJ2	3759	KCNJ2
KCNMB2	10242	KCNMB2
KIF1B	23095	KIF1B
KLF6	1316	KLF6
LAMP3	27074	LAMP3
LCK	3932	LCK
LCP2	3937	LCP2
LDLR	3949	LDLR
LIF	3976	LIF
LPAR1	1902	LPAR1
LTA	4049	LTA
LY6E	4061	LY6E
LYN	4067	LYN
MARCO	8685	MARCO
MEFV	4210	MEFV
MEP1A	4224	MEP1A
MET	4233	MET
MMP14	4323	MMP14
MSR1	4481	MSR1
MXD1	4084	MXD1
MYC	4609	MYC
NAMPT	10135	NAMPT
NDP	4693	NDP
NFKB1	4790	NFKB1
NFKBIA	4792	NFKBIA
NLRP3	114548	NLRP3
NMI	9111	NMI
NMUR1	10316	NMUR1
NOD2	64127	NOD2
NPFFR2	10886	NPFFR2
OLR1	4973	OLR1
OPRK1	4986	OPRK1
OSM	5008	OSM
OSMR	9180	OSMR
P2RX4	5025	P2RX4
P2RX7	5027	P2RX7
P2RY2	5029	P2RY2
PCDH7	5099	PCDH7
PDE4B	5142	PDE4B
PDPN	10630	PDPN
PIK3R5	23533	PIK3R5
PLAUR	5329	PLAUR
PROK2	60675	PROK2
PSEN1	5663	PSEN1
PTAFR	5724	PTAFR
PTGER2	5732	PTGER2
PTGER4	5734	PTGER4
PTGIR	5739	PTGIR
PTPRE	5791	PTPRE
PVR	5817	PVR
RAF1	5894	RAF1
RASGRP1	10125	RASGRP1
RELA	5970	RELA
RGS1	5996	RGS1
RGS16	6004	RGS16
RHOG	391	RHOG
RIPK2	8767	RIPK2
RNF144B	255488	RNF144B
ROS1	6098	ROS1
RTP4	64108	RTP4
SCARF1	8578	SCARF1
SCN1B	6324	SCN1B
SELE	6401	SELE
SELL	6402	SELL
SELS	55829	SELENOS
SEMA4D	10507	SEMA4D
SERPINE1	5054	SERPINE1
SGMS2	166929	SGMS2
SLAMF1	6504	SLAMF1
SLC11A2	4891	SLC11A2
SLC1A2	6506	SLC1A2
SLC28A2	9153	SLC28A2
SLC31A1	1317	SLC31A1
SLC31A2	1318	SLC31A2
SLC4A4	8671	SLC4A4
SLC7A1	6541	SLC7A1
SLC7A2	6542	SLC7A2
SPHK1	8877	SPHK1
SRI	6717	SRI
STAB1	23166	STAB1
TACR1	6869	TACR1
TACR3	6870	TACR3
TAPBP	6892	TAPBP
TIMP1	7076	TIMP1
TLR1	7096	TLR1
TLR2	7097	TLR2
TLR3	7098	TLR3
TNFAIP6	7130	TNFAIP6
TNFRSF1B	7133	TNFRSF1B
TNFRSF9	3604	TNFRSF9
TNFSF10	8743	TNFSF10
TNFSF15	9966	TNFSF15
TNFSF9	8744	TNFSF9
TPBG	7162	TPBG
VIP	7432	VIP
